# Supplementary material for: The Selection of Chief Residents across Residency Programs at a Large Academic Medical Center
Source: Research Square preprint supplement (doi:10.21203/rs.3.rs-2620674/v1), 2023-03-14
Supplement: Supplementary file 1 [file f5d9e6eb2d574aed63e7e0e3.pdf]

**Table 1.** Alphabetically organized list of 21 GME programs with designated chief residents that participated in the study.

| <b>Graduate Medical Education Programs</b>                           |
|----------------------------------------------------------------------|
| Anesthesiology                                                       |
| Dermatology                                                          |
| Emergency Medicine                                                   |
| General Surgery                                                      |
| Internal Medicine (2 distinct programs based at different hospitals) |
| Neurology                                                            |
| Neurological Surgery                                                 |
| Obstetrics and Gynecology                                            |
| Ophthalmology                                                        |
| Orthopedic Surgery                                                   |
| Otolaryngology                                                       |
| Pathology                                                            |
| Pediatrics                                                           |
| Physical Medicine and Rehabilitation                                 |
| Plastic Surgery                                                      |
| Psychiatry                                                           |
| Radiology (2 programs: Diagnostic and Interventional)                |
| Radiation Oncology                                                   |
| Urology                                                              |

**Table 2.** Number of PDs commenting on themes and subthemes. Number of unique quotes also included.

| Theme                              | Subthemes                               | Individual areas   | Number of PDs commenting n (%) | Number of unique quotes |
|------------------------------------|-----------------------------------------|--------------------|--------------------------------|-------------------------|
| Identifying candidates             | Processes                               | Timing             | 16 (76.2)                      | 18                      |
|                                    |                                         | Recruitment        | 17 (80.9)                      | 25                      |
|                                    |                                         | Nomination         | 16 (76.2)                      | 27                      |
|                                    | Attributes                              | Clinical skills    | 19 (90.5)                      | 34                      |
|                                    |                                         | Teaching abilities | 19 (90.5)                      | 35                      |
|                                    |                                         | Personal qualities | 21 (100)                       | 136                     |
|                                    |                                         | DEI consideration  | 14 (66.7)                      | 17                      |
| Application processes              | Expression of intent                    |                    | 8 (38.1)                       | 12                      |
|                                    | Interviews                              |                    | 6 (28.6)                       | 16                      |
| Selection                          | Voting                                  |                    | 15 (71.4)                      | 48                      |
|                                    | Consensus through discussions           |                    | 11 (52.4)                      | 16                      |
|                                    | PD intimately involved in the choice(s) |                    | 11 (52.3)                      | 21                      |
| Confidence in process and outcomes |                                         |                    | 17 (80.9)                      | 28                      |
